# Supplementary material for: Sporadic Amyotrophic Lateral Sclerosis Skeletal Muscle Transcriptome Analysis: A Comprehensive Examination of Differentially Expressed Genes
Source: MDPI journal article supplement (doi:10.3390/biom14030377), 2024-03-20
Supplement: s1 [file s1]

**Supplementary Table S1.** List of abbreviations.

| <b>Abbreviations</b> | <b>Name</b>                                             |
|----------------------|---------------------------------------------------------|
| ALS                  | Amyotrophic Lateral Sclerosis                           |
| sALS                 | Sporadic Amyotrophic Lateral Sclerosis                  |
| fALS                 | Familiar Amyotrophic Lateral Sclerosis                  |
| SOD1                 | Superoxide Dismutase 1                                  |
| FUS                  | FUS RNA Binding Protein                                 |
| C9ORF72              | C9orf72-SMCR8 Complex Subunit                           |
| ATXN2                | Ataxin 2                                                |
| OPTN                 | Optineurin                                              |
| VCP                  | Valosin Containing Protein                              |
| PFN1                 | Profilin 1                                              |
| MATR3                | Matrin 3                                                |
| SETX                 | Senataxin                                               |
| UBQLN2               | Ubiquilin 2                                             |
| LGALS3               | Galectin Like                                           |
| FIG4                 | FIG4 Phosphoinositide 5-Phosphatase                     |
| ALS2                 | Alsin Rho Guanine Nucleotide Exchange Factor<br>ALS2    |
| GEO                  | Gene Expression Omnibus                                 |
| GSE                  | Gene Expression Series                                  |
| DEG                  | Differentially Expressed Genes                          |
| GO                   | Gene Ontology                                           |
| BP                   | Biological Process                                      |
| CC                   | Cellular Component                                      |
| MF                   | Molecular Function                                      |
| PPI                  | Protein-protein Interaction                             |
| MCC                  | Maximum clique centrality                               |
| EIF4A1               | Eukaryotic Translation Initiation Factor 4A1            |
| CCT2                 | CCT2: Chaperonin Containing TCP1 Subunit 2              |
| ETF1                 | Eukaryotic Translation Termination Factor 1             |
| PABPC1               | Poly(A) Binding Protein Cytoplasmic 1                   |
| HNRNPR               | Heterogeneous Nuclear Ribonucleoprotein R               |
| EIF3A                | Eukaryotic Translation Initiation Factor 3<br>Subunit A |
| EEF2                 | Eukaryotic Translation Elongation Factor 2              |
| HNRNPA1              | Heterogeneous Nuclear Ribonucleoprotein A1              |
| RPLP0                | Ribosomal Protein Lateral Stalk Subunit P0              |
| EEF1A1               | Eukaryotic Translation Elongation Factor 1<br>Alpha 1   |
| RAN                  | RAN, Member RAS Oncogene Family                         |
| RPL12                | Ribosomal Protein L12                                   |
| CCT6A                | Chaperonin Containing TCP1 Subunit 6A                   |
| RPL15                | Ribosomal Protein L15                                   |
| CCT3                 | Chaperonin Containing TCP1 Subunit 3                    |
| COX5B                | Cytochrome C Oxidase Subunit 5B                         |
| COX6A2               | Cytochrome C Oxidase Subunit 6A2                        |
| NDUFA4               | NDUFA4 Mitochondrial Complex Associated                 |
| COX6C                | Cytochrome C Oxidase Subunit 6C                         |

|         |                                           |
|---------|-------------------------------------------|
| NDUFB4  | NADH:Ubiquinone Oxidoreductase Subunit B4 |
| ATP5MC1 | ATP Synthase Membrane Subunit C Locus 1   |
| COX8A   | Cytochrome C Oxidase Subunit 8A           |
| NDUFA3  | NADH:Ubiquinone Oxidoreductase Subunit A3 |
| ATP5PF  | ATP Synthase Peripheral Stalk Subunit F6  |
| COX7A1  | Cytochrome C Oxidase Subunit 7A1          |
| COX5A   | Cytochrome C Oxidase Subunit 5A           |
| NDUFA6  | NADH:Ubiquinone Oxidoreductase Subunit A6 |

**Supplementary Table S2.** GSE41414 Sample Set Information.

| ID | Group   | Site of onset | Gender | Age | Biopsied muscle |
|----|---------|---------------|--------|-----|-----------------|
| 1  | Control | -             | Male   | 59  | Deltoid         |
| 2  | Control | -             | Female | 62  | Deltoid         |
| 3  | Control | -             | Male   | 66  | Deltoid         |
| 4  | Control | -             | Female | 60  | Deltoid         |
| 5  | Control | -             | Female | 64  | Deltoid         |
| 6  | Control | -             | Female | 70  | Deltoid         |
| 7  | Control | -             | Male   | 65  | Deltoid         |
| 8  | ALS     | Spinal        | Male   | 73  | Quadriceps      |
| 9  | ALS     | Spinal        | Female | 72  | Quadriceps      |

|    |     |        |        |    |            |
|----|-----|--------|--------|----|------------|
| 10 | ALS | Spinal | Female | 59 | Deltoid    |
| 11 | ALS | Bulbar | Male   | 54 | Deltoid    |
| 12 | ALS | Spinal | Male   | 72 | Deltoid    |
| 13 | ALS | Spinal | Female | 55 | Deltoid    |
| 14 | ALS | Bulbar | Male   | 64 | Quadriceps |
